# Supplementary material
Source: PubMed Central journal article supplement (PMC7448642)
Supplement: JCM.00300-20-s0001.pdf [file JCM.00300-20-s0001.pdf]

## Supplementary information

**A** ASO

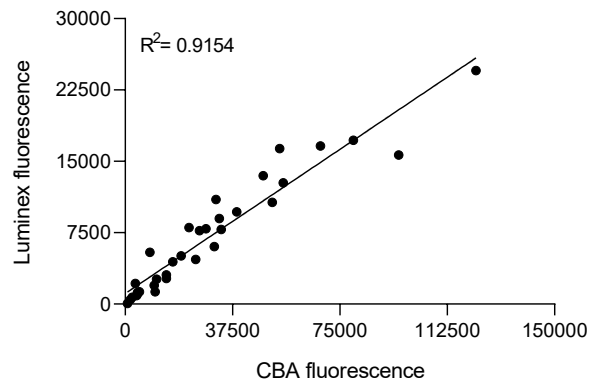

**B** ADB

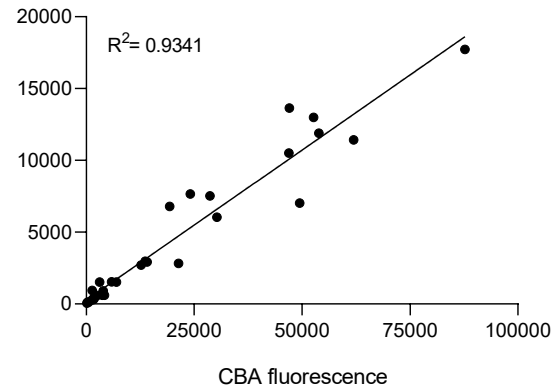

**C** Anti-SpnA

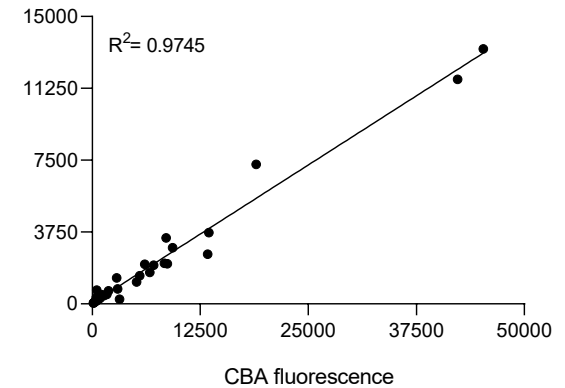

**Supplementary Figure 1:** Scatter plots showing the correlation of (A) ASO, (B) ADB and (C) Anti-SpnA signal, in fluorescence, between the Luminex assay and the cytometric bead array (CBA) (n=33). Strength of correlation is shown as  $R^2$ , obtained by linear regression.

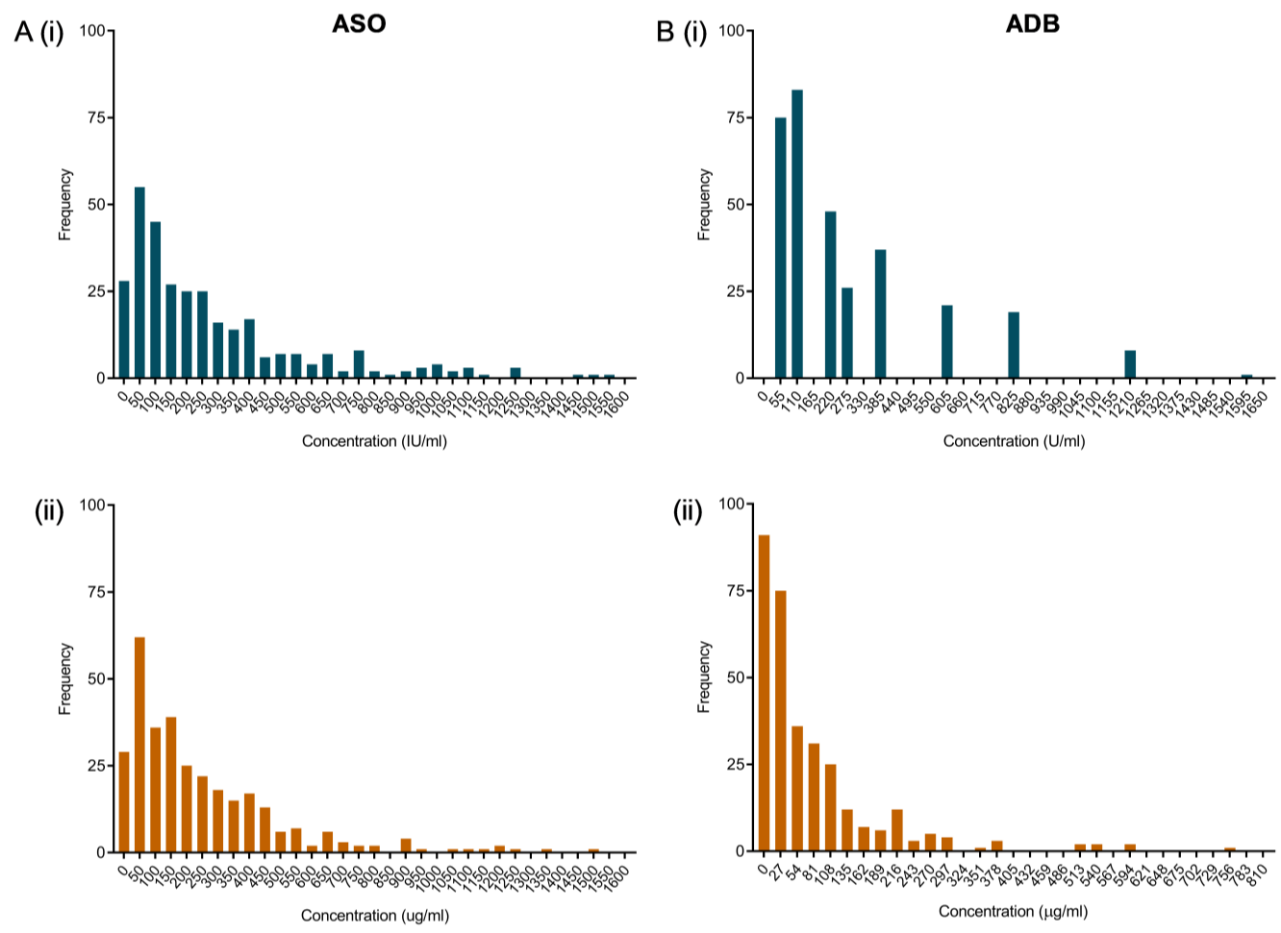

**Supplementary Figure 2:** (A) Distribution of ASO antibodies (n=317), determined either by the (i) commercial turbidimetric assay or the (ii) triplex assay. (B) Distribution of ADB antibodies (n=318), determined either by the (i) commercial enzyme inhibition assay or the (ii) triplex assay.

**Supplementary Table 1:** ULN values determined from various healthy cohorts, including the current guidelines used in clinical practice in Australia and New Zealand. The original units of each ULN are highlighted in blue and reflect the method used to obtain them. Values were interpolated into either  $\mu\text{g/ml}$ , IU/ml or U/mL using the linear regression equations from Figure 1 where  $r^2=0.803$  for ASO and  $r^2=0.782$  for ADB, to allow comparison between methods.

| Year                  | ULN                              | Method            | ASO (IU/ml) | ADB (U/ml) | ASO ( $\mu\text{g/ml}$ ) | ADB ( $\mu\text{g/ml}$ ) | Anti-SpnA ( $\mu\text{g/ml}$ ) |
|-----------------------|----------------------------------|-------------------|-------------|------------|--------------------------|--------------------------|--------------------------------|
| 2019 <sup>(i)</sup>   | NZ RF RISK experimental, all age | Triplex assay     | 412         | 367        | 354                      | 117                      | 64                             |
| 2019 <sup>(ii)</sup>  | NZ RF RISK, all age              | Commercial assays | 422         | 400        | 353                      | 127                      | -                              |
| 1982 <sup>(iii)</sup> | NZ, all age                      | Commercial assays | 480         | 680        | 398                      | 225                      | -                              |
| 2012 <sup>(iv)</sup>  | AUS 1-4                          | Commercial assays | 170         | 366        | 158                      | 115                      | -                              |
|                       | AUS 5-14                         |                   | 276         | 499        | 240                      | 161                      | -                              |
|                       | AUS 15-24                        |                   | 238         | 473        | 211                      | 152                      | -                              |
|                       | AUS 25-34                        |                   | 177         | 390        | 163                      | 123                      | -                              |
|                       | AUS >35                          |                   | 127         | 265        | 125                      | 79                       | -                              |
| 2006 <sup>(v)</sup>   | AUS 4-5                          | Commercial assays | 120         | 100        | 119                      | 21                       | -                              |
|                       | AUS 6-9                          |                   | 480         | 400        | 398                      | 127                      | -                              |
|                       | AUS 10-14                        |                   | 320         | 380        | 274                      | 120                      | -                              |

(i) ULN calculated using titres measured by the triplex assay, from healthy New Zealand children in the RF RISK study (n=75)

(ii) ULN calculated from titres measured using commercial assays, from healthy New Zealand children in the RF RISK study (n=75)

(iii) Current recommended clinical cut-off used in New Zealand for streptococcal serology, calculated from New Zealand children <15 years old, who were at-risk of ARF but hospitalised for other reasons<sup>1</sup>

(iv) Current age-specific recommended clinical cut-offs used in Australia for streptococcal serology, calculated from healthy Fijian participants (n=424)<sup>2</sup>

(v) Age-specific recommended clinical cut-offs used in Australia for streptococcal serology in 2006, calculated from healthy children in Melbourne, Australia (n=66)<sup>3</sup>

**Supplementary Table 2:** Comparison of diagnostic sensitivity of ASO and ADB when different ULN are applied, with sensitivity defined as the number of ARF patients with antibody titres above the ULN. ARF patients were stratified into those with sera obtained <28 days after hospital admission and 28+ after hospital admission. Current clinical ULN values from New Zealand and Australia were first interpolated into  $\mu\text{g/ml}$  using the linear regression equations from Figure 1 where  $r^2=0.803$  for ASO and  $r^2=0.782$  for ADB.

|                             | ASO              |                             |                                   | ADB                     |                |                      |
|-----------------------------|------------------|-----------------------------|-----------------------------------|-------------------------|----------------|----------------------|
|                             | Experimental ULN | NZ all-age ULN <sup>1</sup> | AUS age-specific ULN <sup>2</sup> | NZ all-age experimental | NZ all-age ULN | AUS age-specific ULN |
| ARF < 28 days, n= 72, n (%) | 63 (88)          | 61 (85)                     | 70 (97)                           | 63 (88)                 | 40 (56)        | 54 (75)              |
| ARF 28 + days, n=25, n (%)  | 23 (92)          | 22 (88)                     | 24 (96)                           | 24 (96)                 | 12 (48)        | 20 (80)              |

## References

1. Heart Foundation of New Zealand, Cardiac Society of Australia and New Zealand. Evidence-based, best practice New Zealand Guidelines for Rheumatic Fever: 1. Diagnosis, management and secondary prevention of Acute Rheumatic Fever and Rheumatic Heart Disease: 2014 Update. Heart Foundation of New Zealand, 2014.
2. Steer AC, Vidmar S, Ritika R, Kado J, Batzloff M, Jenney AWJ, et al. Normal Ranges of Streptococcal Antibody Titers Are Similar Whether Streptococci Are Endemic to the Setting or Not. *Clin Vaccine Immunol.* 2009;16:172–5.
3. Danchin MH, Carlin JB, Devenish W, Nolan TM, Carapetis JR. New normal ranges of antistreptolysin O and antideoxyribonuclease B titres for Australian children. *Journal of Paediatrics and Child Health.* 2005;41:583–6.
